# Supplementary material for: Identification of dengue risk-prone areas using multicriteria decision-making model and machine learning algorithm in Kolkata and Howrah Municipal Corporation areas
Source: Research Square preprint supplement (doi:10.21203/rs.3.rs-5231046/v1), 2024-12-09
Supplement: Supplementary file 1 [file a4e2c499f6cadcc1e261ac2e.docx]

**Table 1** Sources of Dataset used in our Research.

| Data | Source | Thematic layers | Spatial Resolution |
| --- | --- | --- | --- |
| SRTM DEM | urs.earthdata.nasa.gov.in | Elevation TWI Slope Aspect | 30 |
| Sentinel Data | https://sentinel.esa.int/web/sentinel/user-guides/sentinel-2-msi/processing-levels/level-2 | LULC | 10 |
| Landsat OLI/TRIS | https://earthexplorer.usgs.gov/ | NDVI NDBI NDMI  LST PV | 30 |
| Population Data | https://censusindia.gov.in/ | Population density | --- |
| Dengue Data | Primary Survey | --- | --- |

| Factor | NDVI | PV | LST | Slope aspect | Slope | TWI | LULC | NDMI | ELEVATION | NDBI | PD |
| --- | --- | --- | --- | --- | --- | --- | --- | --- | --- | --- | --- |
| NDVI | (1,1,1) | (1,1,1) | (1,2,3) | (1,2,3) | (2,3,4) | (2,3,4) | (3,4,5) | (3,4,5) | (4,5,6) | (5,6,7) | (7,8,9) |
| PV | (1/1,1/1,1/1) | (1,1,1) | (1,1,1) | (1,2,3) | (1,2,3) | (2,3,4) | (2,3,4) | (3,4,5) | (3,4,5) | (4,5,6) | (5,6,7) |
| LST | (1/3,1/2,1/1) | (1/1,1/1,1/1) | (1,1,1) | (1,1,1) | (1,2,3) | (1,2,3) | (2,3,4) | (2,3,4) | (3,4,5) | (3,4,5) | (4,5,6) |
| Slope aspect | (1/3,1/2,1/1) | (1/3,1/2,1/1) | (1/1,1/1,1/1) | (1,1,1) | (1,1,1) | (1,2,3) | (1,2,3) | (2,3,4) | (2,3,4) | (3,4,5) | (3,4,5) |
| Slope | (1/4,1/3,1/2) | (1/3,1/2,1/1) | (1/3,1/2,1/1) | (1/1,1/1,1/1) | (1,1,1) | (1,1,1) | (1,2,3) | (1,2,3) | (2,3,4) | (2,3,4) | (3,4,5) |
| TWI | (1/4,1/3,1/2) | (1/4,1/3,1/2) | (1/3,1/2,1/1) | (1/3,1/2,1/1) | (1/1,1/1,1/1) | (1,1,1) | (1,1,1) | (1,2,3) | (1,2,3) | (2,3,4) | (2,3,4) |
| LULC | (1/5,1/4,1/3) | (1/4,1/3,1/2) | (1/4,1/3,1/2) | (1/3,1/2,1/1) | (1/3,1/2,1/1) | (1/1,1/1,1/1) | (1,1,1) | (1,1,1) | (1,2,3) | (1,2,3) | (2,3,4) |
| NDMI | (1/5,1/4,1/3) | (1/5,1/4,1/3) | (1/4,1/3,1/2) | (1/4,1/3,1/2) | (1/3,1/2,1/1) | (1/3,1/2,1/1) | (1/1,1/1,1/1) | (1,1,1) | (1,1,1) | (1,2,3) | (1,2,3) |
| Elevation | (1/6,1/5,1/4) | (1/5,1/4,1/3) | (1/5,1/4,1/3) | (1/4,1/3,1/2) | (1/4,1/3,1/2) | (1/3,1/2,1/1) | (1/3,1/2,1/1) | (1/1,1/1,1/1) | (1,1,1) | (1,1,1) | (1,2,3) |
| NDBI | (1/7,1/6,1/5) | (1/6,1/5,1/4) | (1/5,1/4,1/3) | (1/5,1/4,1/3) | (1/4,1/3,1/2) | (1/4,1/3,1/2) | (1/3,1/2,1/1) | (1/3,1/2,1/1) | (1/1,1/1,1/1) | (1,1,1) | (1,1,1) |
| PD | (1/9,1/8,1/7) | (1/7,1/6,1/5) | (1/6,1/5,1/4) | (1/5,1/4,1/3) | (1/5,1/4,1/3) | (1/4,1/3,1/2) | (1/4,1/3,1/2) | (1/3,1/2,1/1) | (1/3,1/2,1/1) | (1/1,1/1,1/1) | (1,1,1) |

**Table 2** Pair-wise comparisons of factors

**Table 3** Geometric means of fuzzy comparison values

|  | Fuzzy geometric mean value | | |
| --- | --- | --- | --- |
| NDVI | 2.171 | 2.933 | 3.611 |
| PV | 1.819 | 2.428 | 2.957 |
| LST | 1.422 | 1.937 | 2.478 |
| Slope Aspect | 1.134 | 1.571 | 2.105 |
| Slope | 0.905 | 1.253 | 1.708 |
| TWI | 0.722 | 1.000 | 1.385 |
| LULC | 0.586 | 0.798 | 1.105 |
| NDMI | 0.475 | 0.636 | 0.882 |
| Elevation | 0.404 | 0.516 | 0.703 |
| NDBI | 0.338 | 0.412 | 0.550 |
| PD | 0.277 | 0.341 | 0.461 |
| 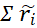 | 10.252 | 13.826 | 17.944 |
| 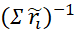 | 0.098 | 0.072 | 0.056 |

**Table 4** Relative fuzzy weights of parameters

|  | Fuzzy weights () | | |
| --- | --- | --- | --- |
| NDVI | 0.212 | 0.212 | 0.201 |
| PV | 0.177 | 0.176 | 0.165 |
| LST | 0.139 | 0.140 | 0.138 |
| Slope aspect | 0.111 | 0.114 | 0.117 |
| Slope | 0.088 | 0.091 | 0.095 |
| TWI | 0.070 | 0.072 | 0.077 |
| LULC | 0.057 | 0.058 | 0.062 |
| NDMI | 0.046 | 0.046 | 0.049 |
| Elevation | 0.039 | 0.037 | 0.039 |
| NDBI | 0.033 | 0.030 | 0.031 |
| PD | 0.027 | 0.025 | 0.026 |

**Table 5** Average and Normalized weights

|  | Weights | Normalized weights |
| --- | --- | --- |
| NDVI | 0.208 | 0.208 |
| PV | 0.173 | 0.173 |
| LST | 0.139 | 0.139 |
| Slope aspect | 0.114 | 0.114 |
| Slope | 0.091 | 0.091 |
| TWI | 0.073 | 0.073 |
| LULC | 0.059 | 0.059 |
| NDMI | 0.047 | 0.047 |
| Elevation | 0.039 | 0.039 |
| NDBI | 0.031 | 0.031 |
| PD | 0.026 | 0.026 |
|  |  | 1.000 |

**Table 6** Distribution of Dengue Risk Susceptibility Zone (DRSZ)

| Dengue Risk Susceptibility Zone | Colour | FAHP | | | | RF | | | |
| --- | --- | --- | --- | --- | --- | --- | --- | --- | --- |
| HMC | | KMC | | HMC | | KMC | |
| Area (km) | Area (%) | Area (km) | Area (%) | Area (km) | Area (%) | Area (km) | Area (%) |
| Very High |  | 0.089 | 0.171 | 7.431 | 3.952 | 12.010 | 23.124 | 38.528 | 20.490 |
| High |  | 2.029 | 3.889 | 17.669 | 9.397 | 9.110 | 17.541 | 48.196 | 25.631 |
| Moderate |  | 4.962 | 9.513 | 34.890 | 18.555 | 8.031 | 15.464 | 32.738 | 17.410 |
| Low |  | 10.882 | 20.860 | 61.261 | 32.579 | 10.151 | 19.546 | 31.188 | 16.586 |
| Very Low |  | 34.203 | 65.567 | 66.785 | 35.517 | 12.633 | 24.325 | 37.387 | 19.883 |

**Table 7** Comparison of error matrix

|  | RMSE | MSE | Kappa Statistics | AUC |
| --- | --- | --- | --- | --- |
| FAHP | 0.291 | 0.085 | 0.745 | 0.843 |
| RF | 0.265 | 0.070 | 0.913 | 0.833 |
